# Supplementary material for: New Perspectives on the Electronic and Geometric Structure of Au70S20(PPh3)12 Cluster: Superatomic-Network Core Protected by Novel Au12(µ3-S)10 Staple Motifs
Source: PubMed Central journal article supplement (PMC6722785; doi:10.3390/nano9081132), 2019-08-06
Supplement: nanomaterials-09-01132-s001.pdf [file nanomaterials-09-01132-s001.pdf]

Supplementary Materials

**New Perspectives on the Electronic and Geometric Structure of  $\text{Au}_{70}\text{S}_{20}(\text{PPh}_3)_{12}$  Cluster: Superatomic-network Core Protected by Novel  $\text{Au}_{12}(\mu_3\text{-S})_{10}$  Staple Motifs**

Zhimei Tian,<sup>1,2</sup> Yangyang Xu,<sup>3</sup> Longjiu Cheng<sup>\*1,4</sup>

<sup>1</sup> Department of Chemistry, Anhui University, Hefei 230601, Anhui, China; clj@ustc.edu (L.C)

<sup>2</sup> School of Chemistry and Materials Engineering, Fuyang Normal University, Fuyang 236037, Anhui, China; thzm@fync.edu.cn (Z.T.)

<sup>3</sup> School of Social and Public Administration, East China University of Science and Technology, Shanghai 200237, China; gogoundok\_cool@126.com (Y.X.)

<sup>4</sup> Anhui Province Key Laboratory of Chemistry for Inorganic/Organic Hybrid Functionalized Materials, Anhui University, Hefei 230601, Anhui, China

\* Correspondence: clj@ustc.edu (L.C.); Tel.: +86-0551-63861279 (L.C.)

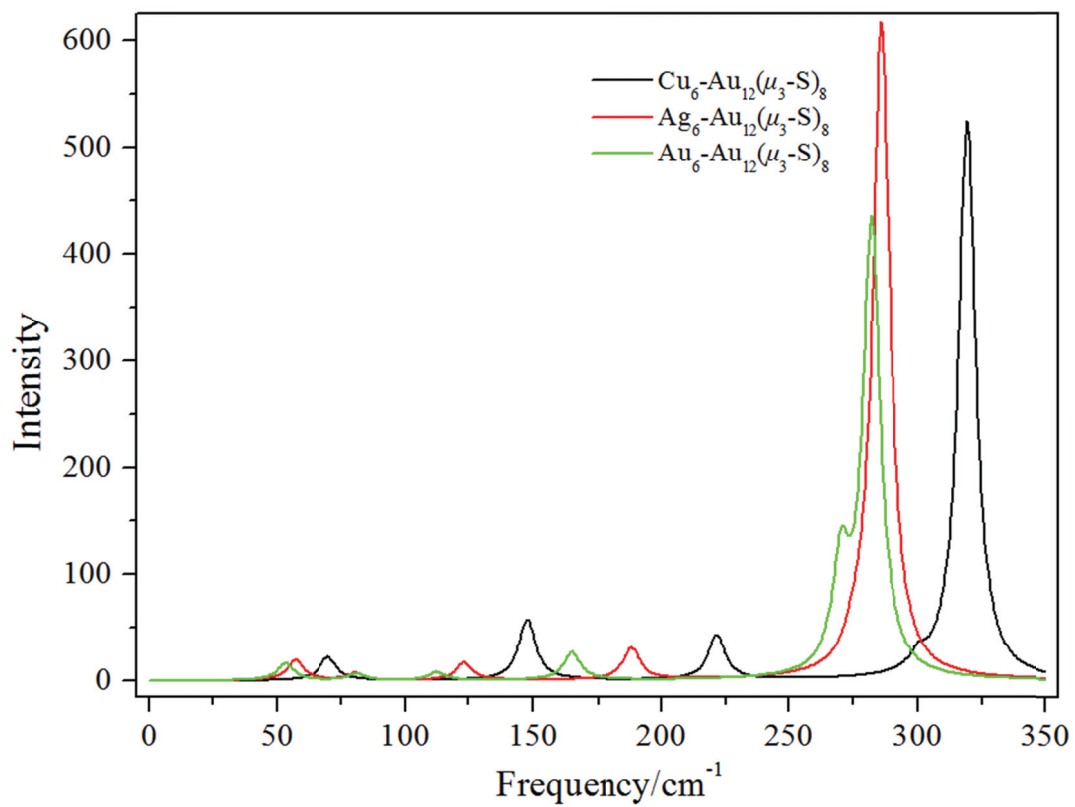

**Figure S1.** IR spectra of Cu<sub>12</sub>-Au<sub>12</sub>(μ<sub>3</sub>-S)<sub>8</sub>, Ag<sub>6</sub>-Au<sub>12</sub>(μ<sub>3</sub>-S)<sub>8</sub> and Au<sub>6</sub>-Au<sub>12</sub>(μ<sub>3</sub>-S)<sub>8</sub> clusters.

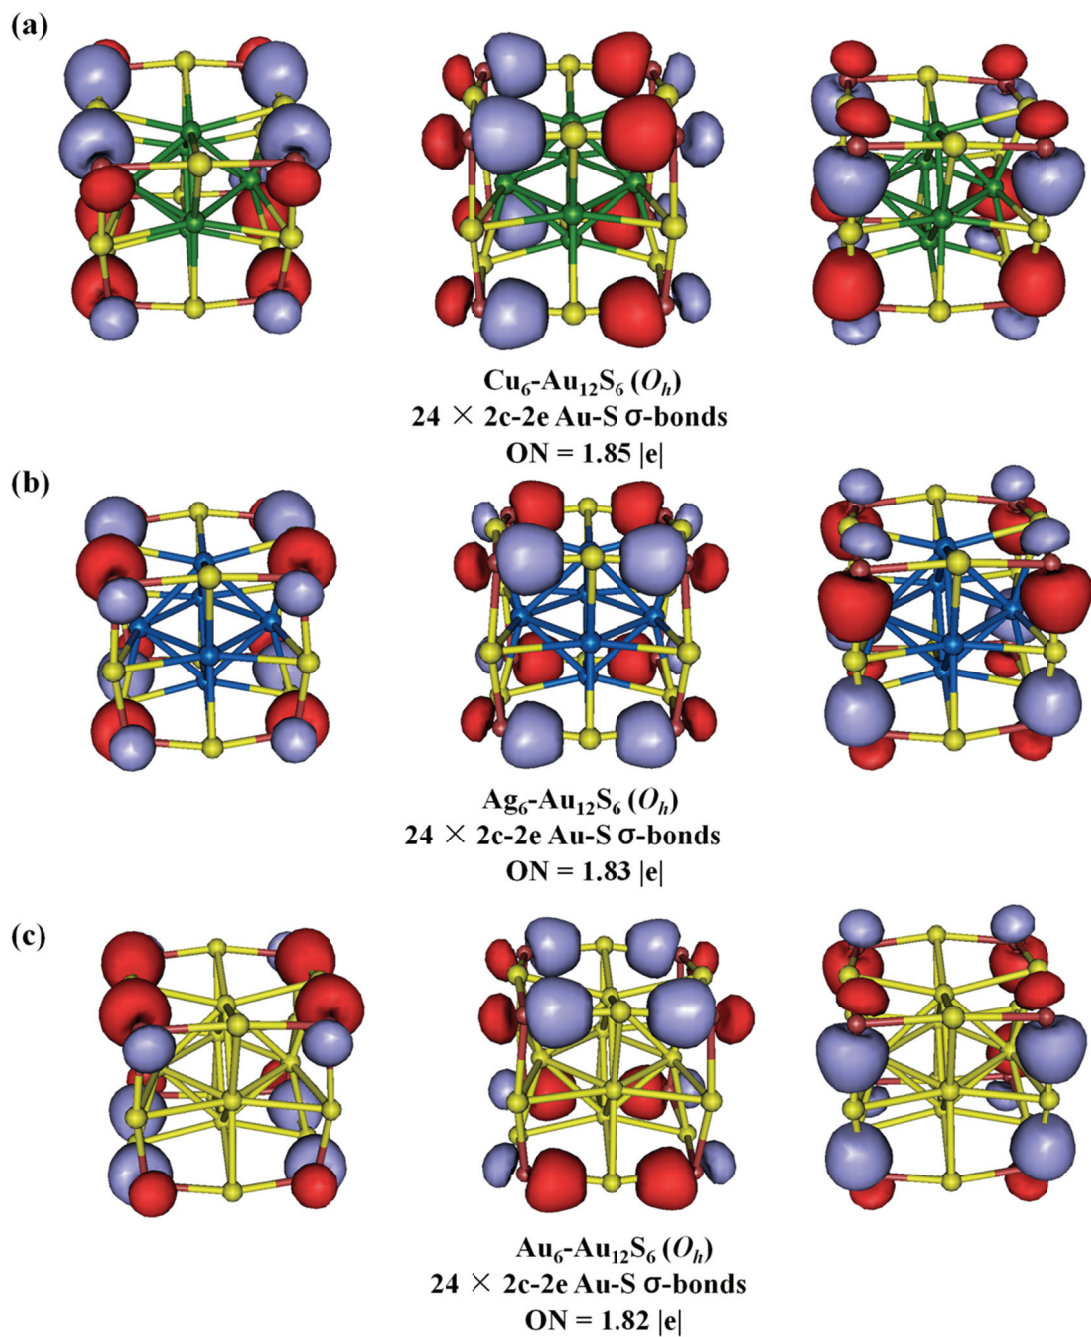

**Figure S2.** Geometries (Cu, green; Ag, blue; Au, yellow) and AdNDP localized natural bonding orbitals of Au-S  $\sigma$ -bonds in (a)  $\text{Cu}_{12}\text{-}(\mu_3\text{-S})_8$ , (b)  $\text{Ag}_6\text{-Au}_{12}\text{-}(\mu_3\text{-S})_8$  and (c)  $\text{Au}_6\text{-Au}_{12}\text{-}(\mu_3\text{-S})_8$  clusters.
